# Supplementary material for: A Platinum Resistance-Related lncRNA Signature for Risk Classification and Prognosis Prediction in Patients with Serous Ovarian Cancer
Source: Hindawi journal article supplement (doi:10.1155/2022/7625138), 2022-11-09

Fig.S1 Construction and validation of the IncScore-clinicopathologic nomogram for survival prediction in SOC patients.

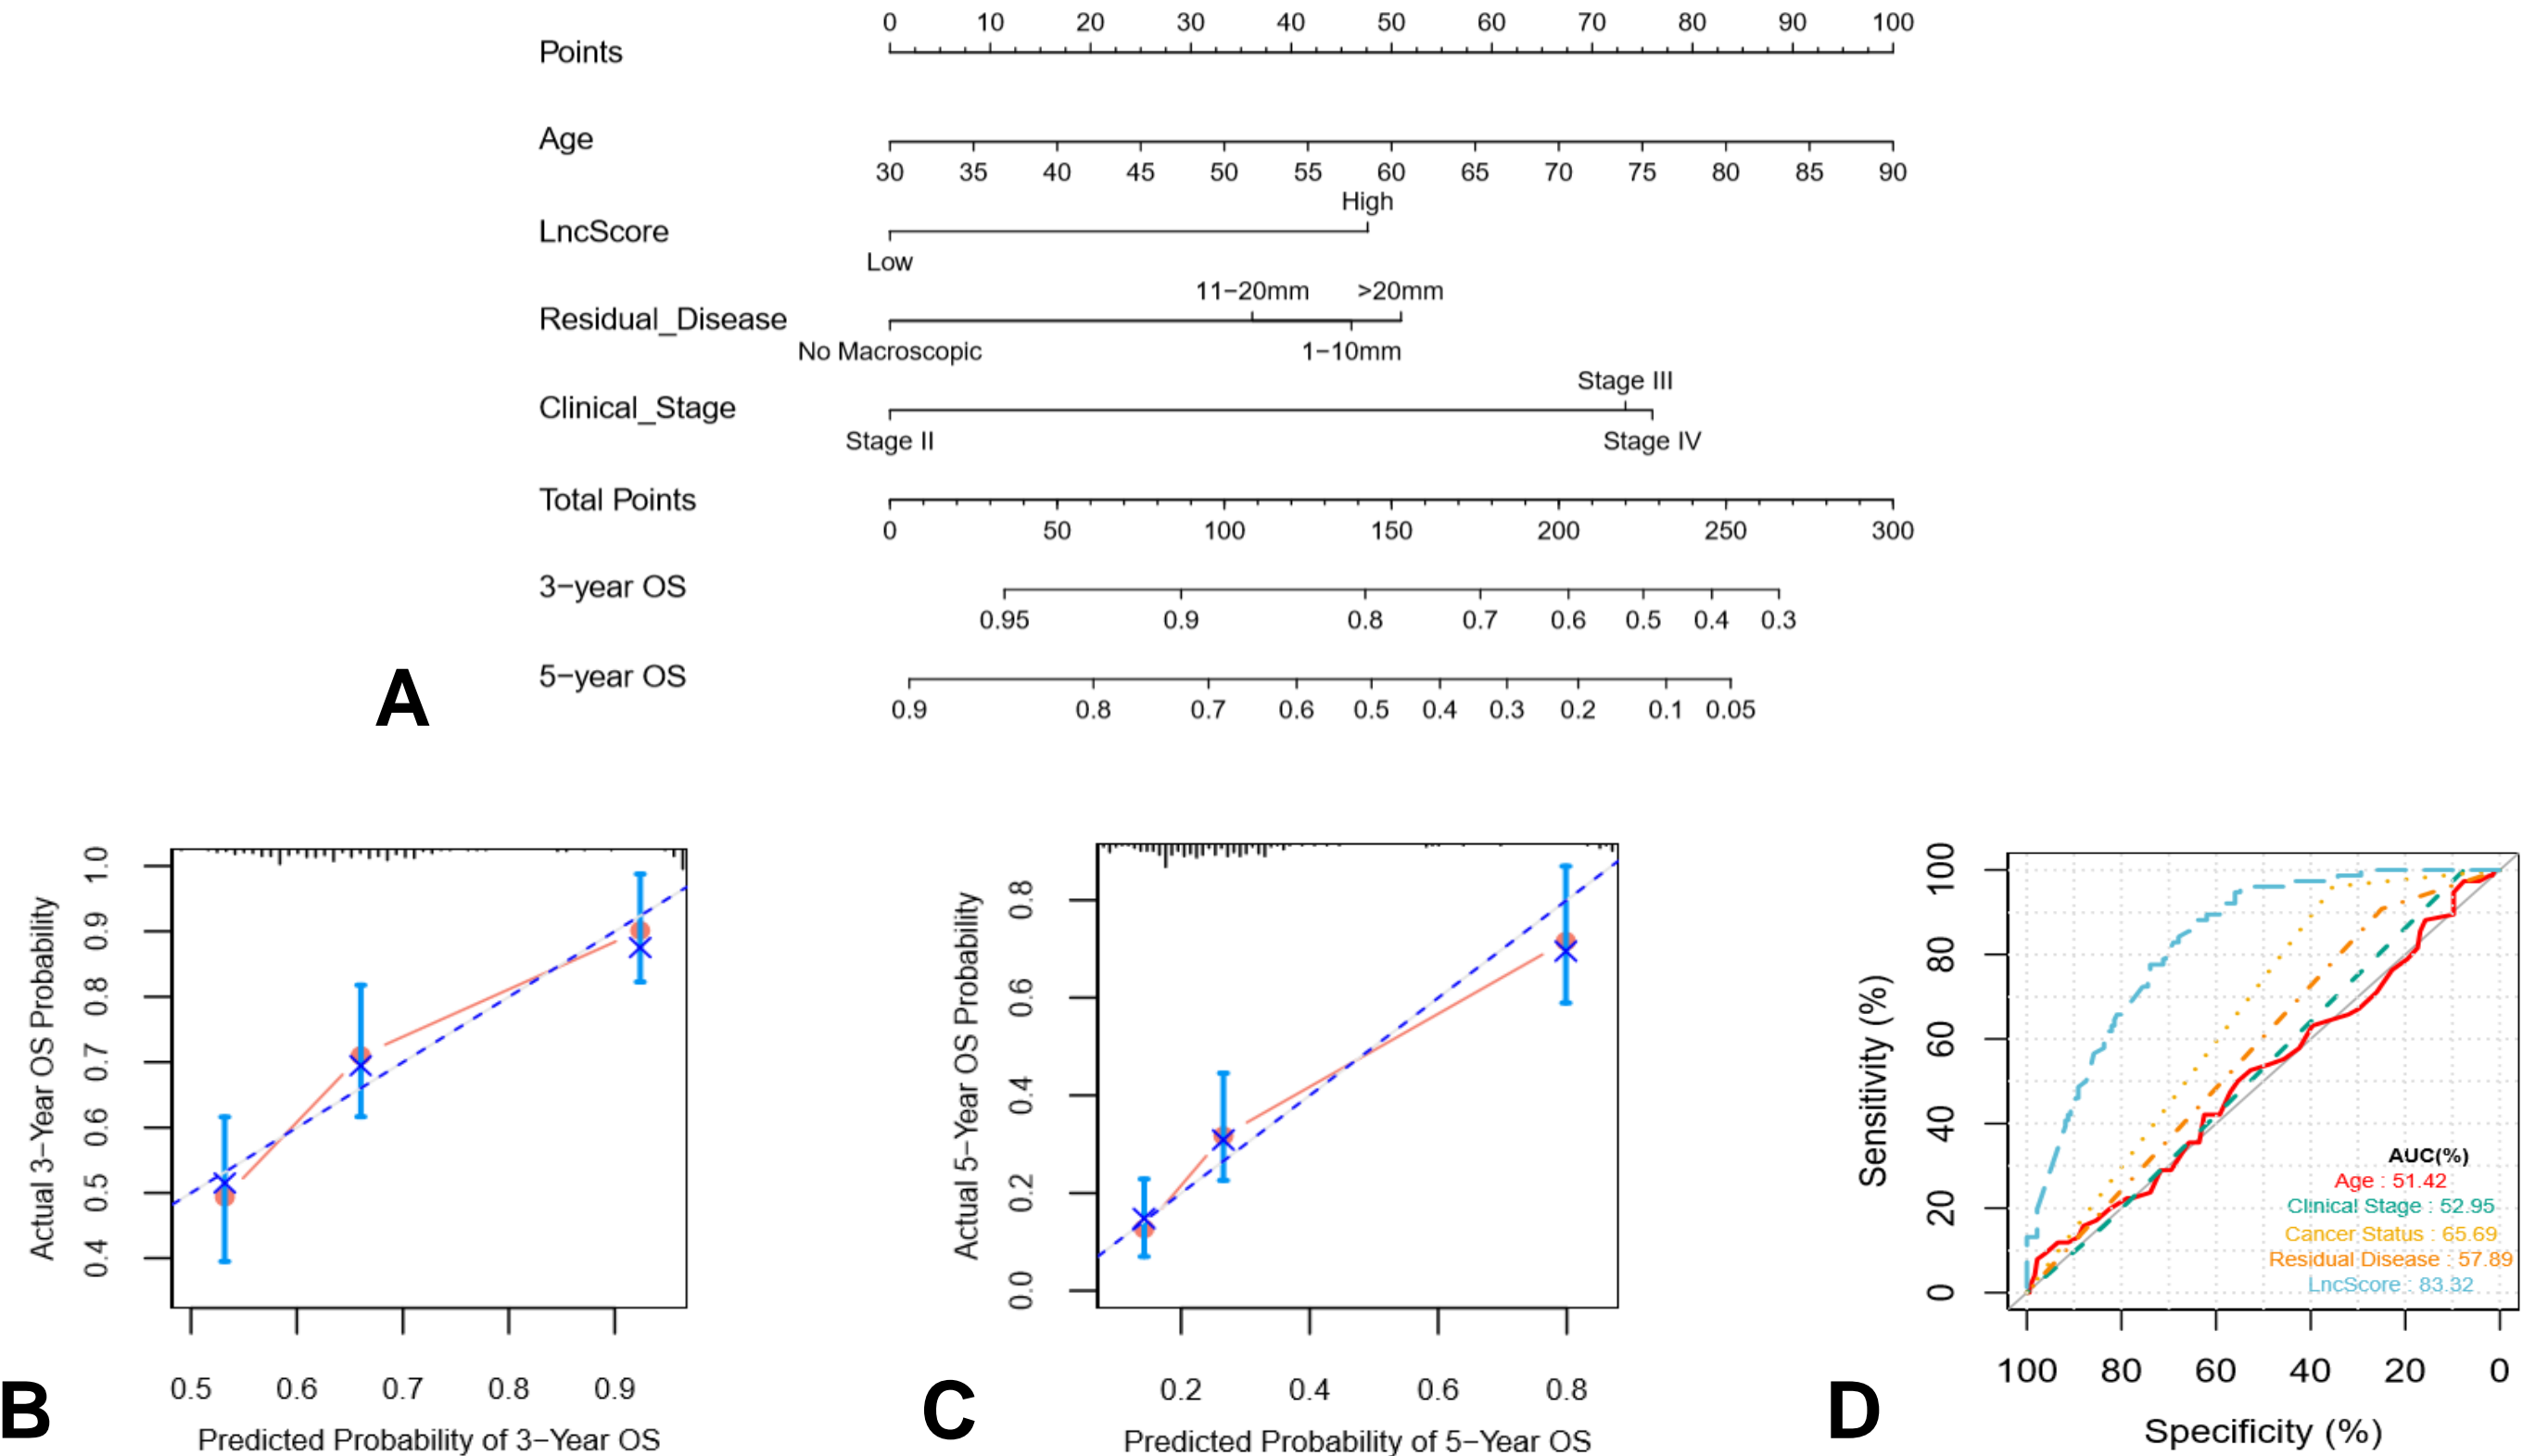

Supplement: f1 [file 7625138.f1.zip]
