# Supplementary material for: A Platinum Resistance-Related lncRNA Signature for Risk Classification and Prognosis Prediction in Patients with Serous Ovarian Cancer
Source: Hindawi journal article supplement (doi:10.1155/2022/7625138), 2022-11-09
Supplement: f1 [file 7625138.f1.zip]

| NO. | row        | Tumor vs Normal |              |          |          |           |           | Sensitive vs Resistant |          |          |          |          |
|-----|------------|-----------------|--------------|----------|----------|-----------|-----------|------------------------|----------|----------|----------|----------|
|     |            | baseMean        | L2FC         | lfcSE    | stat     | PValue    | padj      | L2FC                   | logCPM   | F        | PValue   | FDR      |
| 1   | A2ML1-AS2  | 0.5233174       | 2.108088242  | 0.36779  | 5.731773 | 9.94E-09  | 1.69E-08  | -1.890933194           | 2.285373 | 23.74049 | 1.78E-06 | 0.000195 |
| 2   | AC002115.1 | 0.9482178       | 2.074669713  | 0.300358 | 6.90733  | 4.94E-12  | 9.29E-12  | -1.211058699           | 2.214297 | 13.4462  | 0.00029  | 0.012719 |
| 3   | AC002351.1 | 5.9810215       | 5.443695858  | 0.42683  | 12.75379 | 2.97E-37  | 9.29E-37  | 1.449296056            | 4.459626 | 13.4236  | 0.000295 | 0.012863 |
| 4   | AC003659.1 | 0.2955067       | 1.41938787   | 0.479103 | 2.962595 | 0.003051  | 0.004158  | -1.267116142           | 1.573704 | 19.15345 | 1.66E-05 | 0.001207 |
| 5   | AC003975.1 | 0.2922065       | 1.45496472   | 0.439706 | 3.308948 | 0.000936  | 0.001314  | 1.485683903            | 1.736217 | 28.48652 | 1.86E-07 | 2.66E-05 |
| 6   | AC004147.2 | 0.8899717       | 2.273168593  | 0.471919 | 4.816857 | 1.46E-06  | 2.31E-06  | -1.574881907           | 2.132151 | 16.56404 | 6.01E-05 | 0.003503 |
| 7   | AC004835.1 | 1.7002303       | 1.335300643  | 0.216247 | 6.174896 | 6.62E-10  | 1.17E-09  | -1.838362196           | 2.946622 | 28.50111 | 1.84E-07 | 2.66E-05 |
| 8   | AC004920.1 | 0.4998541       | 2.27632673   | 0.479423 | 4.748056 | 2.05E-06  | 3.23E-06  | 1.174780917            | 1.781475 | 17.4472  | 3.87E-05 | 0.002432 |
| 9   | AC005307.1 | 17.708781       | 6.660967751  | 0.308663 | 21.58008 | 2.76E-103 | 2.03E-102 | -1.366123713           | 5.722839 | 11.30175 | 0.000877 | 0.028773 |
| 10  | AC005487.1 | 1.6024283       | 3.259393291  | 0.322554 | 10.10497 | 5.25E-24  | 1.31E-23  | 1.676043362            | 2.724355 | 31.02566 | 5.64E-08 | 9.53E-06 |
| 11  | AC005614.1 | 2.432151        | 1.972074734  | 0.210632 | 9.362651 | 7.78E-21  | 1.81E-20  | -1.061534316           | 2.699559 | 15.69055 | 9.31E-05 | 0.004972 |
| 12  | AC006058.3 | 0.9743284       | 2.210640884  | 0.341151 | 6.479958 | 9.17E-11  | 1.66E-10  | 1.031189648            | 2.1657   | 11.95701 | 0.000623 | 0.022675 |
| 13  | AC006065.4 | 0.6475368       | 2.310973191  | 0.450367 | 5.131316 | 2.88E-07  | 4.67E-07  | -1.096529001           | 1.883929 | 10.06181 | 0.001669 | 0.047401 |
| 14  | AC006262.3 | 0.9278177       | 3.056215914  | 0.522852 | 5.845278 | 5.06E-09  | 8.69E-09  | 1.329299538            | 2.125913 | 15.94052 | 8.21E-05 | 0.004551 |
| 15  | AC006372.1 | 2.0792265       | 2.617007734  | 0.302561 | 8.649513 | 5.17E-18  | 1.14E-17  | -1.20575859            | 2.767843 | 11.85789 | 0.000656 | 0.02326  |
| 16  | AC006372.2 | 1.1103049       | 1.779674512  | 0.347488 | 5.121544 | 3.03E-07  | 4.91E-07  | 1.300543131            | 2.437959 | 15.3732  | 0.000109 | 0.005756 |
| 17  | AC007099.1 | 0.8709594       | 2.758403129  | 0.246315 | 11.19869 | 4.14E-29  | 1.13E-28  | -1.819370893           | 2.565099 | 28.44351 | 1.89E-07 | 2.67E-05 |
| 18  | AC007422.1 | 5.4011611       | 5.324937411  | 0.302342 | 17.61231 | 1.98E-69  | 9.92E-69  | -1.187001397           | 3.705597 | 11.88666 | 0.000647 | 0.023224 |
| 19  | AC007423.1 | 0.5613144       | 2.025395072  | 0.400801 | 5.053369 | 4.34E-07  | 7.00E-07  | 2.133615688            | 2.100209 | 50.78222 | 7.61E-12 | 3.63E-09 |
| 20  | AC007922.3 | 0.9719353       | 3.145594989  | 0.529687 | 5.938592 | 2.87E-09  | 4.98E-09  | -1.221762231           | 2.09948  | 10.66041 | 0.00122  | 0.037101 |
| 21  | AC008060.1 | 2.066518        | 1.846184711  | 0.412117 | 4.479763 | 7.47E-06  | 1.15E-05  | -2.691407753           | 3.659836 | 29.05229 | 1.44E-07 | 2.15E-05 |
| 22  | AC008278.1 | 1.5182806       | 3.029070028  | 0.250685 | 12.0832  | 1.30E-33  | 3.81E-33  | 1.829768289            | 2.868209 | 45.03638 | 9.55E-11 | 3.39E-08 |
| 23  | AC008568.1 | 0.7644705       | 2.242751378  | 0.515183 | 4.35331  | 1.34E-05  | 2.04E-05  | -1.9593443             | 2.364716 | 20.80514 | 7.41E-06 | 0.000611 |
| 24  | AC008938.1 | 0.9217078       | 1.744393398  | 0.218806 | 7.972346 | 1.56E-15  | 3.23E-15  | -1.175155499           | 2.377682 | 13.95696 | 0.000224 | 0.010242 |
| 25  | AC009060.1 | 1.4179775       | 1.941162827  | 0.296762 | 6.541147 | 6.10E-11  | 1.11E-10  | -1.166651164           | 2.550856 | 10.3615  | 0.001427 | 0.041958 |
| 26  | AC009123.1 | 5.8072237       | -3.548750299 | 0.182671 | -19.427  | 4.56E-84  | 2.73E-83  | -1.252005475           | 1.94167  | 15.36498 | 0.00011  | 0.005756 |
| 27  | AC009133.3 | 6.1831796       | 2.454466191  | 0.208304 | 11.78308 | 4.77E-32  | 1.37E-31  | 1.383564927            | 4.268693 | 23.65843 | 1.87E-06 | 0.000197 |
| 28  | AC009365.1 | 0.3613542       | 1.449159363  | 0.282719 | 5.125792 | 2.96E-07  | 4.80E-07  | 2.585686353            | 1.981697 | 88.15325 | 1.52E-18 | 1.96E-15 |
| 29  | AC009407.1 | 1.8560791       | 1.57794478   | 0.195658 | 8.064804 | 7.34E-16  | 1.53E-15  | 1.192915788            | 2.758238 | 23.63654 | 1.87E-06 | 0.000197 |
| 30  | AC009988.1 | 0.6425028       | 2.513744621  | 0.373227 | 6.735156 | 1.64E-11  | 3.03E-11  | -1.498183269           | 1.894602 | 21.45496 | 5.39E-06 | 0.000479 |
| 31  | AC010247.2 | 8.8079968       | 2.474013514  | 0.146009 | 16.94422 | 2.12E-64  | 9.87E-64  | 1.763081511            | 4.858685 | 68.29641 | 4.53E-15 | 4.25E-12 |
| 32  | AC010894.3 | 21.954856       | 2.41187281   | 0.206612 | 11.67344 | 1.74E-31  | 4.94E-31  | -1.659901845           | 5.460169 | 18.93555 | 1.86E-05 | 0.001335 |
| 33  | AC011474.1 | 1.8408516       | 3.640872685  | 0.393696 | 9.247926 | 2.29E-20  | 5.29E-20  | 1.504037926            | 2.869342 | 19.21117 | 1.62E-05 | 0.001186 |
| 34  | AC012103.1 | 0.4220554       | 1.842532898  | 0.419081 | 4.396609 | 1.10E-05  | 1.68E-05  | 1.719697357            | 1.86557  | 36.47009 | 4.54E-09 | 1.06E-06 |
| 35  | AC012150.1 | 0.6895919       | 1.160825073  | 0.33542  | 3.460813 | 0.000539  | 0.000765  | 2.442954617            | 2.31212  | 66.36182 | 1.00E-14 | 7.93E-12 |
| 36  | AC015522.1 | 2.1819419       | 3.832692835  | 0.359698 | 10.65532 | 1.65E-26  | 4.29E-26  | -1.33886656            | 3.088864 | 10.94241 | 0.001055 | 0.03312  |
| 37  | AC016885.1 | 0.3151744       | 1.408478069  | 0.446085 | 3.157419 | 0.001592  | 0.002203  | 1.588672358            | 1.827275 | 27.45147 | 3.03E-07 | 3.95E-05 |

| NO. | row        | Tumor vs Normal |              |          |          |           |           | Sensitive vs Resistant |          |          |          |          |
|-----|------------|-----------------|--------------|----------|----------|-----------|-----------|------------------------|----------|----------|----------|----------|
|     |            | baseMean        | L2FC         | lfcSE    | stat     | PValue    | padj      | L2FC                   | logCPM   | F        | PValue   | FDR      |
| 38  | AC021192.1 | 0.4812284       | 2.167421748  | 0.357643 | 6.060297 | 1.36E-09  | 2.38E-09  | -1.038375257           | 1.767307 | 12.15341 | 0.000563 | 0.021087 |
| 39  | AC021218.1 | 3.7420582       | 4.336405191  | 0.281574 | 15.40058 | 1.62E-53  | 6.51E-53  | 1.069788369            | 3.583134 | 12.65866 | 0.000435 | 0.017477 |
| 40  | AC021979.2 | 0.4399912       | 1.292699608  | 0.339782 | 3.804495 | 0.000142  | 0.000207  | -1.369649337           | 1.890734 | 14.96746 | 0.000134 | 0.006641 |
| 41  | AC022424.1 | 217.26516       | -5.407735742 | 0.229631 | -23.5496 | 1.27E-122 | 1.16E-121 | -1.470972318           | 4.188872 | 13.24894 | 0.000322 | 0.013649 |
| 42  | AC022730.4 | 5.1262299       | -1.327745799 | 0.289311 | -4.58934 | 4.45E-06  | 6.91E-06  | -2.339531332           | 3.091427 | 30.65343 | 6.76E-08 | 1.12E-05 |
| 43  | AC023051.1 | 5.717323        | 1.065799626  | 0.138872 | 7.674671 | 1.66E-14  | 3.34E-14  | 1.733588081            | 4.133783 | 58.91801 | 2.30E-13 | 1.39E-10 |
| 44  | AC023796.1 | 0.4602121       | 2.028464184  | 0.438235 | 4.628708 | 3.68E-06  | 5.74E-06  | 3.463858376            | 2.720034 | 113.538  | 1.06E-22 | 3.25E-19 |
| 45  | AC025569.1 | 84.898829       | -1.654677597 | 0.160056 | -10.3381 | 4.74E-25  | 1.21E-24  | -1.006851463           | 5.919034 | 12.68666 | 0.000429 | 0.017333 |
| 46  | AC034228.1 | 1.7162292       | 3.282501872  | 0.431138 | 7.613582 | 2.67E-14  | 5.33E-14  | -2.0581376             | 2.712518 | 24.63228 | 1.17E-06 | 0.00014  |
| 47  | AC067960.1 | 0.8465366       | 2.786049708  | 0.417987 | 6.6654   | 2.64E-11  | 4.86E-11  | 1.725706826            | 2.326753 | 31.02712 | 5.63E-08 | 9.53E-06 |
| 48  | AC068489.1 | 0.4045494       | 1.84799243   | 0.448598 | 4.119481 | 3.80E-05  | 5.67E-05  | -1.253357272           | 1.681045 | 16.22452 | 7.12E-05 | 0.00399  |
| 49  | AC068594.1 | 0.6018603       | 2.133756379  | 0.327716 | 6.510999 | 7.47E-11  | 1.36E-10  | 1.662496677            | 2.08904  | 34.04947 | 1.38E-08 | 2.64E-06 |
| 50  | AC069061.2 | 1.0670399       | 2.969072211  | 0.488982 | 6.071947 | 1.26E-09  | 2.21E-09  | -3.285202549           | 3.229985 | 40.93063 | 6.13E-10 | 1.71E-07 |
| 51  | AC069285.2 | 0.7634874       | 2.792302262  | 0.575109 | 4.855261 | 1.20E-06  | 1.91E-06  | 1.782127034            | 2.774821 | 23.65442 | 1.87E-06 | 0.000197 |
| 52  | AC080129.1 | 0.2812047       | 1.367020939  | 0.393723 | 3.472033 | 0.000517  | 0.000734  | -1.312388314           | 1.687971 | 17.71027 | 3.40E-05 | 0.002195 |
| 53  | AC083967.1 | 21.505884       | 7.427718957  | 0.292181 | 25.42163 | 1.45E-142 | 1.65E-141 | -1.934803068           | 6.441636 | 19.47451 | 1.43E-05 | 0.001069 |
| 54  | AC087379.2 | 0.4837668       | 1.686710348  | 0.383266 | 4.40089  | 1.08E-05  | 1.65E-05  | -1.498965693           | 2.09411  | 16.41813 | 6.46E-05 | 0.003681 |
| 55  | AC087482.1 | 5.9565637       | -3.244342184 | 0.135673 | -23.9129 | 2.25E-126 | 2.14E-125 | -1.411646468           | 2.607391 | 14.41763 | 0.000177 | 0.008355 |
| 56  | AC087636.1 | 1.5622195       | 3.578548386  | 0.384944 | 9.296295 | 1.45E-20  | 3.37E-20  | 1.138270882            | 2.365051 | 13.26373 | 0.000318 | 0.013584 |
| 57  | AC090044.1 | 4.860338        | -1.770155082 | 0.21541  | -8.21761 | 2.08E-16  | 4.40E-16  | -1.205282562           | 2.47683  | 12.41013 | 0.000493 | 0.019108 |
| 58  | AC090340.1 | 2.1633745       | 3.054321013  | 0.249907 | 12.22182 | 2.38E-34  | 7.09E-34  | 1.864569313            | 3.178135 | 44.25361 | 1.36E-10 | 4.24E-08 |
| 59  | AC090826.2 | 0.9838          | -1.067206857 | 0.240446 | -4.43846 | 9.06E-06  | 1.39E-05  | 1.251380109            | 1.853728 | 21.10684 | 6.39E-06 | 0.000549 |
| 60  | AC092155.1 | 69.242384       | -6.495940365 | 0.153136 | -42.4194 | 0         | 0         | -1.44645186            | 2.650081 | 16.45554 | 6.35E-05 | 0.003634 |
| 61  | AC092484.1 | 17.662577       | 6.932799332  | 0.299225 | 23.16916 | 9.32E-119 | 8.17E-118 | 1.170775783            | 5.231375 | 13.70015 | 0.000256 | 0.011459 |
| 62  | AC092747.1 | 0.4773423       | 1.844067559  | 0.295144 | 6.248022 | 4.16E-10  | 7.38E-10  | -1.08557252            | 1.917372 | 11.90523 | 0.000639 | 0.023084 |
| 63  | AC092834.1 | 0.4956363       | 1.263234816  | 0.382277 | 3.304502 | 0.000951  | 0.001334  | 1.213012344            | 2.097475 | 11.36953 | 0.000844 | 0.028133 |
| 64  | AC092916.1 | 2.2227436       | 4.272528205  | 0.69637  | 6.135432 | 8.49E-10  | 1.50E-09  | -2.499619544           | 3.718867 | 23.14823 | 2.40E-06 | 0.000237 |
| 65  | AC092954.1 | 0.8859075       | 1.958492063  | 0.349808 | 5.598769 | 2.16E-08  | 3.64E-08  | -1.333359715           | 1.99697  | 16.53963 | 6.08E-05 | 0.003503 |
| 66  | AC092957.1 | 2.1688121       | 4.325274795  | 0.6293   | 6.873151 | 6.28E-12  | 1.18E-11  | -1.51005144            | 2.977077 | 11.36165 | 0.000849 | 0.028133 |
| 67  | AC093821.1 | 4.1473113       | 4.670892612  | 0.380524 | 12.2749  | 1.24E-34  | 3.70E-34  | 2.087376538            | 4.328059 | 29.91606 | 9.63E-08 | 1.48E-05 |
| 68  | AC095050.1 | 0.699074        | 1.638036651  | 0.330438 | 4.957164 | 7.15E-07  | 1.14E-06  | -1.003216635           | 1.851614 | 10.4591  | 0.001356 | 0.040383 |
| 69  | AC097375.1 | 0.8511835       | 2.807203711  | 0.395569 | 7.096625 | 1.28E-12  | 2.45E-12  | -1.270510649           | 2.154079 | 13.09819 | 0.000346 | 0.014514 |
| 70  | AC097532.1 | 0.2500223       | 1.249027077  | 0.430738 | 2.899737 | 0.003735  | 0.005063  | -1.17849531            | 1.665033 | 13.27665 | 0.000316 | 0.01358  |
| 71  | AC099509.1 | 0.6064364       | 1.40270384   | 0.361445 | 3.880818 | 0.000104  | 0.000153  | -1.292449697           | 2.095225 | 11.38712 | 0.000836 | 0.02807  |
| 72  | AC099542.1 | 1.9822347       | -1.720592063 | 0.163728 | -10.5088 | 7.87E-26  | 2.03E-25  | -1.019026677           | 1.901772 | 14.41148 | 0.000178 | 0.008355 |
| 73  | AC100872.2 | 15.501318       | 5.449410107  | 0.263385 | 20.68989 | 4.27E-95  | 2.87E-94  | -1.239903486           | 5.103473 | 13.4916  | 0.000284 | 0.012576 |
| 74  | AC105383.1 | 6.2122331       | -1.242477937 | 0.153972 | -8.06953 | 7.06E-16  | 1.48E-15  | -1.039151486           | 3.202657 | 12.34227 | 0.00051  | 0.019633 |

| NO. | row        | Tumor vs Normal |              |          |          |           |           | Sensitive vs Resistant |          |          |          |          |
|-----|------------|-----------------|--------------|----------|----------|-----------|-----------|------------------------|----------|----------|----------|----------|
|     |            | baseMean        | L2FC         | lfcSE    | stat     | PValue    | padj      | L2FC                   | logCPM   | F        | PValue   | FDR      |
| 75  | AC105460.1 | 1.1433753       | 3.384119908  | 0.366659 | 9.229608 | 2.72E-20  | 6.27E-20  | 1.766758642            | 3.016258 | 28.16538 | 2.18E-07 | 2.99E-05 |
| 76  | AC108136.1 | 0.748076        | 2.676435729  | 0.380287 | 7.037941 | 1.95E-12  | 3.71E-12  | -1.228149211           | 2.146209 | 12.04233 | 0.000596 | 0.021942 |
| 77  | AC108868.1 | 0.4692068       | 2.094431968  | 0.442224 | 4.73613  | 2.18E-06  | 3.42E-06  | -2.944774271           | 2.872975 | 37.81031 | 2.50E-09 | 6.29E-07 |
| 78  | AC108868.2 | 0.5680523       | 2.306922443  | 0.56155  | 4.108131 | 3.99E-05  | 5.95E-05  | -2.464533144           | 2.217378 | 32.67911 | 2.61E-08 | 4.81E-06 |
| 79  | AC109492.1 | 0.8789663       | 3.022007133  | 0.515757 | 5.859359 | 4.65E-09  | 7.99E-09  | -1.598968911           | 2.350535 | 15.36029 | 0.00011  | 0.005756 |
| 80  | AC113194.1 | 1.1081938       | 2.25794887   | 0.384882 | 5.8666   | 4.45E-09  | 7.66E-09  | -1.894181419           | 2.256582 | 24.8806  | 1.03E-06 | 0.000126 |
| 81  | AC114284.1 | 6.425929        | -2.637752536 | 0.190226 | -13.8664 | 1.01E-43  | 3.51E-43  | -1.014701239           | 2.739215 | 9.935136 | 0.001784 | 0.049975 |
| 82  | AC121154.1 | 0.6515727       | 2.099741589  | 0.393859 | 5.331195 | 9.76E-08  | 1.61E-07  | -1.13710792            | 1.998009 | 10.32775 | 0.001452 | 0.042398 |
| 83  | AC124067.3 | 0.5444624       | 1.469996439  | 0.401204 | 3.663959 | 0.000248  | 0.000358  | -2.071091735           | 2.387684 | 23.57025 | 1.94E-06 | 0.000202 |
| 84  | AC125616.1 | 2.3312716       | 2.697201137  | 0.300341 | 8.980474 | 2.70E-19  | 6.11E-19  | -1.124731649           | 2.75483  | 10.60731 | 0.001255 | 0.037927 |
| 85  | AC129507.1 | 209.13811       | -1.363494501 | 0.149434 | -9.1244  | 7.21E-20  | 1.65E-19  | -1.092303427           | 7.433568 | 15.08049 | 0.000127 | 0.006391 |
| 86  | AC130456.4 | 1.2998104       | 3.596623974  | 0.300696 | 11.961   | 5.69E-33  | 1.65E-32  | 1.055612421            | 2.635421 | 12.78958 | 0.000406 | 0.01666  |
| 87  | AC131094.1 | 2.4539264       | 4.478820768  | 0.432893 | 10.34625 | 4.35E-25  | 1.11E-24  | -2.741497091           | 4.053894 | 30.55386 | 7.14E-08 | 1.15E-05 |
| 88  | AC134312.1 | 37.027883       | -1.915255432 | 0.177794 | -10.7723 | 4.65E-27  | 1.22E-26  | 1.056234598            | 4.588292 | 18.53684 | 2.26E-05 | 0.001564 |
| 89  | AC147651.3 | 0.7043183       | 2.123085006  | 0.384201 | 5.525976 | 3.28E-08  | 5.49E-08  | 1.882577855            | 2.264237 | 37.32149 | 3.08E-09 | 7.38E-07 |
| 90  | AC246787.2 | 2.0493995       | 3.923480874  | 0.341358 | 11.49374 | 1.42E-30  | 3.96E-30  | -1.105818922           | 2.638233 | 10.07686 | 0.001656 | 0.047161 |
| 91  | AF106564.1 | 4.8010938       | -1.552232029 | 0.256757 | -6.04554 | 1.49E-09  | 2.60E-09  | 1.0311124              | 2.510092 | 10.14497 | 0.001598 | 0.04601  |
| 92  | AGBL1-AS1  | 0.6624141       | 1.768267062  | 0.316182 | 5.592566 | 2.24E-08  | 3.77E-08  | -1.823920196           | 2.441751 | 21.05379 | 6.56E-06 | 0.000556 |
| 93  | AL033504.1 | 1.0930701       | 1.792557557  | 0.341478 | 5.249403 | 1.53E-07  | 2.50E-07  | -3.117096356           | 3.488918 | 40.72907 | 6.72E-10 | 1.82E-07 |
| 94  | AL033527.2 | 5.6879938       | 5.156377049  | 0.210721 | 24.47016 | 3.07E-132 | 3.13E-131 | -1.42512185            | 4.843253 | 18.64721 | 2.15E-05 | 0.001495 |
| 95  | AL079303.1 | 6.6458283       | 3.279162557  | 0.302156 | 10.85253 | 1.94E-27  | 5.14E-27  | -1.714549944           | 4.081209 | 19.54248 | 1.38E-05 | 0.00104  |
| 96  | AL109610.1 | 0.5149029       | 2.266309414  | 0.553949 | 4.091188 | 4.29E-05  | 6.40E-05  | 1.531556661            | 1.904255 | 24.25618 | 1.39E-06 | 0.000163 |
| 97  | AL117372.1 | 11.971737       | 5.721593897  | 0.34917  | 16.38628 | 2.40E-60  | 1.06E-59  | -1.44076904            | 5.222711 | 10.90505 | 0.001077 | 0.033541 |
| 98  | AL122034.1 | 1.4691196       | 3.252080593  | 0.290974 | 11.17654 | 5.31E-29  | 1.45E-28  | 1.827853566            | 2.813245 | 39.10664 | 1.37E-09 | 3.62E-07 |
| 99  | AL133232.1 | 0.2832602       | 1.35026327   | 0.381065 | 3.543394 | 0.000395  | 0.000565  | -2.084359013           | 2.36428  | 23.93018 | 1.63E-06 | 0.000181 |
| 100 | AL133370.1 | 9.3521363       | 3.81978097   | 0.250028 | 15.27743 | 1.08E-52  | 4.28E-52  | -2.389723497           | 4.919609 | 35.213   | 8.26E-09 | 1.70E-06 |
| 101 | AL136962.1 | 26.957276       | 4.673829729  | 0.209    | 22.36286 | 9.05E-111 | 7.20E-110 | 1.021573756            | 6.087471 | 12.45618 | 0.000483 | 0.018998 |
| 102 | AL138885.2 | 2.193716        | 4.3689348    | 0.297678 | 14.67672 | 9.09E-49  | 3.41E-48  | -1.071867356           | 2.778552 | 11.58993 | 0.000753 | 0.026027 |
| 103 | AL138930.1 | 0.6440267       | 2.149235161  | 0.308677 | 6.962733 | 3.34E-12  | 6.31E-12  | -1.025550251           | 2.031355 | 9.957462 | 0.001763 | 0.049526 |
| 104 | AL139002.1 | 1.1826239       | 2.826552693  | 0.406991 | 6.945001 | 3.78E-12  | 7.15E-12  | -1.728247389           | 2.992524 | 15.81611 | 8.77E-05 | 0.004733 |
| 105 | AL160262.1 | 0.6428983       | 2.533241034  | 0.419051 | 6.045181 | 1.49E-09  | 2.61E-09  | -1.383571467           | 2.062665 | 14.70497 | 0.000153 | 0.007415 |
| 106 | AL162713.1 | 2.0766692       | -2.506883033 | 0.169992 | -14.747  | 3.21E-49  | 1.21E-48  | 1.108956197            | 1.743351 | 18.74302 | 2.04E-05 | 0.001438 |
| 107 | AL353681.1 | 0.7905656       | 1.063296806  | 0.280986 | 3.784164 | 0.000154  | 0.000224  | 1.37844773             | 2.081502 | 22.5288  | 3.20E-06 | 0.000308 |
| 108 | AL354714.1 | 7.2117586       | -3.194907995 | 0.149936 | -21.3085 | 9.47E-101 | 6.80E-100 | -1.211981335           | 2.475472 | 15.84958 | 8.60E-05 | 0.004711 |
| 109 | AL354864.1 | 0.8100215       | 2.405558749  | 0.244499 | 9.838741 | 7.67E-23  | 1.87E-22  | -4.047094237           | 4.451374 | 53.2982  | 2.68E-12 | 1.38E-09 |
| 110 | AL356804.1 | 0.8433338       | 1.81567645   | 0.369176 | 4.918181 | 8.74E-07  | 1.39E-06  | -2.19543211            | 2.486799 | 27.98551 | 2.36E-07 | 3.20E-05 |
| 111 | AL359378.1 | 0.6388923       | 2.474494188  | 0.365048 | 6.778541 | 1.21E-11  | 2.26E-11  | 2.078910371            | 2.998356 | 35.60952 | 6.83E-09 | 1.53E-06 |

| NO. | row          | Tumor vs Normal |              |          |          |           |           | Sensitive vs Resistant |          |          |          |          |
|-----|--------------|-----------------|--------------|----------|----------|-----------|-----------|------------------------|----------|----------|----------|----------|
|     |              | baseMean        | L2FC         | lfcSE    | stat     | PValue    | padj      | L2FC                   | logCPM   | F        | PValue   | FDR      |
| 112 | AL360169.1   | 1.5502966       | 3.870507203  | 0.330441 | 11.71317 | 1.09E-31  | 3.10E-31  | 1.263491057            | 2.808159 | 16.55402 | 6.05E-05 | 0.003503 |
| 113 | AL390786.1   | 1.2294135       | 3.51100841   | 0.417678 | 8.406023 | 4.24E-17  | 9.16E-17  | -1.381188275           | 2.554391 | 13.21719 | 0.000326 | 0.013778 |
| 114 | AL391361.2   | 0.6052014       | 1.450632859  | 0.302091 | 4.801973 | 1.57E-06  | 2.48E-06  | 1.640311615            | 2.059579 | 33.06932 | 2.18E-08 | 4.08E-06 |
| 115 | AL391704.1   | 1.0584706       | 3.238970435  | 0.391113 | 8.281414 | 1.22E-16  | 2.60E-16  | -1.761447245           | 2.823278 | 18.06238 | 2.86E-05 | 0.001927 |
| 116 | AL445465.1   | 1.8840498       | 2.528797185  | 0.268311 | 9.424889 | 4.31E-21  | 1.01E-20  | -1.888698122           | 3.299684 | 24.0281  | 1.56E-06 | 0.000175 |
| 117 | AL449403.1   | 3.8294016       | -3.438828516 | 0.181928 | -18.9021 | 1.10E-79  | 6.24E-79  | -1.962586383           | 2.383159 | 23.72445 | 1.80E-06 | 0.000195 |
| 118 | AL451048.1   | 0.6393611       | 2.308171471  | 0.417909 | 5.523148 | 3.33E-08  | 5.58E-08  | 1.368847404            | 1.850607 | 22.25816 | 3.65E-06 | 0.000342 |
| 119 | AL499627.1   | 0.4768485       | 1.570773176  | 0.40362  | 3.891714 | 9.95E-05  | 0.000146  | -1.237011067           | 1.7074   | 15.06159 | 0.000128 | 0.006394 |
| 120 | AL513324.1   | 0.774458        | 2.566538709  | 0.322667 | 7.954138 | 1.80E-15  | 3.73E-15  | 1.309966307            | 2.23831  | 19.93601 | 1.13E-05 | 0.000871 |
| 121 | AL513542.1   | 0.3964636       | 1.445933409  | 0.389373 | 3.713494 | 0.000204  | 0.000296  | 1.176150095            | 1.631138 | 20.12159 | 1.03E-05 | 0.000801 |
| 122 | AL583785.1   | 20.673176       | 1.430157834  | 0.257659 | 5.550584 | 2.85E-08  | 4.78E-08  | -1.345644757           | 6.031736 | 10.60318 | 0.001261 | 0.037992 |
| 123 | AL591686.1   | 0.9202696       | 1.44278644   | 0.366392 | 3.937824 | 8.22E-05  | 0.000121  | 1.240691914            | 2.077997 | 15.8397  | 8.64E-05 | 0.004711 |
| 124 | AL606519.1   | 1.3412718       | 3.649296368  | 0.35183  | 10.37232 | 3.31E-25  | 8.45E-25  | -1.141089739           | 2.331646 | 11.57059 | 0.00076  | 0.026033 |
| 125 | AL683887.1   | 0.6930242       | 2.6506022    | 0.37792  | 7.013663 | 2.32E-12  | 4.41E-12  | -1.072789457           | 1.937887 | 11.28683 | 0.000881 | 0.028818 |
| 126 | AL731537.1   | 3.2129074       | -1.904957091 | 0.187989 | -10.1334 | 3.93E-24  | 9.82E-24  | 1.499906792            | 2.111834 | 30.05425 | 8.88E-08 | 1.41E-05 |
| 127 | AP003774.2   | 6.0337497       | 1.513167667  | 0.122045 | 12.39841 | 2.67E-35  | 8.08E-35  | 1.23644129             | 3.985231 | 42.60455 | 2.83E-10 | 8.32E-08 |
| 128 | AP007216.2   | 1.483861        | 2.269154975  | 0.243024 | 9.337163 | 9.90E-21  | 2.30E-20  | 1.852616421            | 2.726755 | 48.55448 | 2.02E-11 | 8.32E-09 |
| 129 | BX546450.1   | 0.4379515       | 1.184138895  | 0.414338 | 2.857903 | 0.004265  | 0.00576   | -1.51356502            | 1.814687 | 18.88137 | 1.90E-05 | 0.001352 |
| 130 | C10orf71-AS1 | 0.6338645       | 1.970674694  | 0.502955 | 3.918192 | 8.92E-05  | 0.000131  | -1.802126138           | 1.790394 | 24.9995  | 9.74E-07 | 0.000121 |
| 131 | C20orf78     | 0.3415862       | 1.158342496  | 0.398645 | 2.9057   | 0.003664  | 0.004971  | -1.380568854           | 1.587453 | 22.11852 | 3.90E-06 | 0.000359 |
| 132 | CELF2-AS1    | 59.229639       | -4.734319674 | 0.127679 | -37.0799 | 5.92E-301 | 2.79E-299 | 1.261198664            | 3.624464 | 24.27676 | 1.38E-06 | 0.000163 |
| 133 | CISTR        | 1.338049        | -1.105833686 | 0.279203 | -3.96068 | 7.47E-05  | 0.00011   | 2.486511127            | 2.052523 | 66.58521 | 9.12E-15 | 7.83E-12 |
| 134 | ERICH3-AS1   | 0.8063208       | 2.675805815  | 0.486043 | 5.505289 | 3.69E-08  | 6.17E-08  | -1.727271867           | 2.094258 | 20.16435 | 1.01E-05 | 0.00079  |
| 135 | ERVK-28      | 1.5230476       | 2.859840934  | 0.341493 | 8.374526 | 5.54E-17  | 1.19E-16  | -1.515034185           | 2.397769 | 18.34428 | 2.48E-05 | 0.001687 |
| 136 | FAM167A-AS   | 1.487271        | -1.630766079 | 0.376339 | -4.33324 | 1.47E-05  | 2.23E-05  | -3.668287996           | 3.731895 | 44.13619 | 1.47E-10 | 4.46E-08 |
| 137 | FARSA-AS1    | 4.7853693       | 2.796600016  | 0.153486 | 18.22058 | 3.54E-74  | 1.88E-73  | 3.416829085            | 5.100077 | 190.3937 | 7.90E-34 | 8.14E-30 |
| 138 | FP671120.6   | 254.03021       | 8.185049139  | 0.210502 | 38.88342 | 0         | 0         | 1.102766076            | 8.915997 | 16.28386 | 6.95E-05 | 0.003938 |
| 139 | FRMD6-AS2    | 19.898573       | -5.679739172 | 0.192638 | -29.484  | 4.62E-191 | 8.41E-190 | 1.159471085            | 1.870044 | 15.21772 | 0.000118 | 0.006087 |
| 140 | GACAT3       | 5.5013372       | -1.868285515 | 0.176746 | -10.5705 | 4.08E-26  | 1.06E-25  | -1.294571895           | 2.546019 | 16.75439 | 5.47E-05 | 0.003275 |
| 141 | GATA3-AS1    | 1.4825983       | 2.717178509  | 0.285324 | 9.523146 | 1.68E-21  | 3.97E-21  | 1.461409837            | 2.784744 | 23.49174 | 2.01E-06 | 0.000207 |
| 142 | GPR50-AS1    | 0.8478949       | 2.607015383  | 0.489802 | 5.322587 | 1.02E-07  | 1.69E-07  | -1.703672202           | 2.775041 | 14.81092 | 0.000145 | 0.007171 |
| 143 | HNF1A-AS1    | 9.0023562       | 4.508162293  | 0.282272 | 15.97097 | 2.04E-57  | 8.59E-57  | -1.724940723           | 6.374451 | 11.85335 | 0.000659 | 0.02326  |
| 144 | HOXA-AS3     | 25.841176       | 2.283967805  | 0.222273 | 10.27552 | 9.09E-25  | 2.30E-24  | 1.082151468            | 5.541914 | 12.08753 | 0.000584 | 0.021722 |
| 145 | IGFL2-AS1    | 74.043854       | 4.572749353  | 0.223047 | 20.50125 | 2.10E-93  | 1.39E-92  | 1.40631956             | 7.422344 | 16.85521 | 5.23E-05 | 0.00317  |
| 146 | LINC00112    | 0.4779102       | 2.127667338  | 0.335773 | 6.336627 | 2.35E-10  | 4.19E-10  | 1.146703877            | 1.955935 | 15.18314 | 0.00012  | 0.006152 |
| 147 | LINC00314    | 2.2546199       | 3.666413803  | 0.324175 | 11.31    | 1.17E-29  | 3.23E-29  | -1.092090473           | 2.788136 | 10.50783 | 0.001322 | 0.039486 |
| 148 | LINC00348    | 1.3740288       | 3.723530591  | 0.57696  | 6.453705 | 1.09E-10  | 1.97E-10  | -1.919739878           | 2.385511 | 21.5057  | 5.27E-06 | 0.000472 |

| NO. | row       | Tumor vs Normal |              |          |          |           |           | Sensitive vs Resistant |          |          |          |          |
|-----|-----------|-----------------|--------------|----------|----------|-----------|-----------|------------------------|----------|----------|----------|----------|
|     |           | baseMean        | L2FC         | lfcSE    | stat     | PValue    | padj      | L2FC                   | logCPM   | F        | PValue   | FDR      |
| 149 | LINC00390 | 1.2794845       | 1.913829428  | 0.358993 | 5.3311   | 9.76E-08  | 1.61E-07  | 1.511339246            | 2.502165 | 21.70767 | 4.77E-06 | 0.000431 |
| 150 | LINC00393 | 5.1328755       | 5.123472644  | 0.391902 | 13.07334 | 4.68E-39  | 1.51E-38  | -1.349402594           | 3.871736 | 10.79328 | 0.001141 | 0.035108 |
| 151 | LINC00477 | 0.4955193       | 1.835675406  | 0.405494 | 4.527012 | 5.98E-06  | 9.26E-06  | -1.587298697           | 1.844211 | 21.1593  | 6.23E-06 | 0.000539 |
| 152 | LINC00639 | 40.178451       | 1.432169442  | 0.160196 | 8.940129 | 3.89E-19  | 8.78E-19  | -1.013444552           | 6.227199 | 12.51458 | 0.000469 | 0.018638 |
| 153 | LINC00645 | 9.1562372       | 5.802375218  | 0.332408 | 17.45556 | 3.12E-68  | 1.54E-67  | -1.819949689           | 5.433185 | 16.19528 | 7.27E-05 | 0.00405  |
| 154 | LINC00836 | 3.8659102       | 4.884933686  | 0.361746 | 13.50376 | 1.49E-41  | 4.99E-41  | -3.549559671           | 5.061299 | 44.61999 | 1.19E-10 | 3.98E-08 |
| 155 | LINC01151 | 6.8069363       | 5.156951175  | 0.301281 | 17.11677 | 1.11E-65  | 5.27E-65  | -1.171422648           | 4.026148 | 11.13828 | 0.000953 | 0.030895 |
| 156 | LINC01159 | 1.5224049       | 2.887914528  | 0.475555 | 6.072719 | 1.26E-09  | 2.20E-09  | 3.972704456            | 3.768842 | 117.5599 | 2.74E-23 | 1.41E-19 |
| 157 | LINC01160 | 32.221045       | -1.594721783 | 0.118604 | -13.4457 | 3.26E-41  | 1.09E-40  | 1.186491128            | 4.913881 | 34.75171 | 1.00E-08 | 2.02E-06 |
| 158 | LINC01229 | 26.274768       | -4.268295557 | 0.122014 | -34.982  | 4.22E-268 | 1.53E-266 | -1.934538035           | 3.585547 | 29.89461 | 9.64E-08 | 1.48E-05 |
| 159 | LINC01230 | 2.3302402       | 1.776742278  | 0.311717 | 5.699856 | 1.20E-08  | 2.03E-08  | -1.590099588           | 2.903203 | 17.66776 | 3.47E-05 | 0.002211 |
| 160 | LINC01266 | 9.1356513       | -1.005323139 | 0.217024 | -4.63232 | 3.62E-06  | 5.64E-06  | -1.512062323           | 3.414286 | 17.86762 | 3.15E-05 | 0.002068 |
| 161 | LINC01419 | 0.9004813       | 2.907703521  | 0.445758 | 6.523049 | 6.89E-11  | 1.25E-10  | -3.768292446           | 3.307347 | 50.47239 | 9.01E-12 | 3.94E-09 |
| 162 | LINC01541 | 4.6360533       | 2.074108171  | 0.587489 | 3.530462 | 0.000415  | 0.000592  | -4.977498611           | 6.167386 | 50.84709 | 7.74E-12 | 3.63E-09 |
| 163 | LINC01553 | 1.3030028       | 3.144716281  | 0.243672 | 12.90553 | 4.19E-38  | 1.33E-37  | -1.833382172           | 3.161401 | 24.22019 | 1.42E-06 | 0.000163 |
| 164 | LINC01593 | 0.5483475       | 1.966616708  | 0.456028 | 4.31249  | 1.61E-05  | 2.45E-05  | -1.076201199           | 1.777035 | 10.56947 | 0.00128  | 0.03834  |
| 165 | LINC01632 | 0.7483542       | 2.720114042  | 0.465363 | 5.845145 | 5.06E-09  | 8.70E-09  | 1.097454553            | 2.132892 | 11.11038 | 0.000965 | 0.030994 |
| 166 | LINC01639 | 4.6112955       | 4.736889948  | 0.460381 | 10.28907 | 7.89E-25  | 2.00E-24  | 1.23074612             | 3.523083 | 10.83397 | 0.001117 | 0.034577 |
| 167 | LINC01673 | 0.5386358       | 2.383053321  | 0.420701 | 5.664477 | 1.47E-08  | 2.49E-08  | -1.557002438           | 1.828345 | 23.38825 | 2.11E-06 | 0.000211 |
| 168 | LINC01693 | 2.0577995       | 3.551381511  | 0.314357 | 11.2973  | 1.35E-29  | 3.72E-29  | 1.27029976             | 2.889343 | 16.94515 | 4.97E-05 | 0.003052 |
| 169 | LINC01722 | 2.2030384       | 2.721352363  | 0.281486 | 9.667793 | 4.13E-22  | 9.90E-22  | 1.185582459            | 2.700582 | 17.42199 | 3.92E-05 | 0.002448 |
| 170 | LINC01754 | 1.5525494       | 1.516788223  | 0.247249 | 6.13467  | 8.53E-10  | 1.50E-09  | 1.159532463            | 2.521451 | 15.79434 | 8.84E-05 | 0.004744 |
| 171 | LINC01767 | 5.233724        | 2.54180946   | 0.17949  | 14.16126 | 1.59E-45  | 5.70E-45  | -2.091647589           | 5.160678 | 27.5968  | 2.86E-07 | 3.83E-05 |
| 172 | LINC01777 | 1.2312413       | 3.301189001  | 0.387079 | 8.528458 | 1.48E-17  | 3.24E-17  | -1.299843716           | 2.562872 | 12.01073 | 0.000606 | 0.022222 |
| 173 | LINC01785 | 10.100094       | -2.349189886 | 0.218489 | -10.752  | 5.80E-27  | 1.52E-26  | 1.220126589            | 3.208571 | 12.2376  | 0.00054  | 0.020457 |
| 174 | LINC01793 | 2.5334007       | 2.928742932  | 0.377218 | 7.764066 | 8.22E-15  | 1.67E-14  | 1.532227755            | 4.920304 | 12.45872 | 0.000483 | 0.018998 |
| 175 | LINC01887 | 1.5510649       | 3.68474075   | 0.2532   | 14.5527  | 5.61E-48  | 2.09E-47  | -1.116320161           | 2.730535 | 13.52227 | 0.000279 | 0.012393 |
| 176 | LINC01897 | 0.7588338       | 2.734794625  | 0.405051 | 6.751724 | 1.46E-11  | 2.71E-11  | 1.05374476             | 1.917064 | 12.3613  | 0.000506 | 0.019515 |
| 177 | LINC01926 | 0.3655108       | 1.433320244  | 0.369411 | 3.880012 | 0.000104  | 0.000153  | -1.154006387           | 1.729746 | 12.74978 | 0.000414 | 0.016869 |
| 178 | LINC02006 | 14.71785        | 1.27745397   | 0.15758  | 8.106686 | 5.20E-16  | 1.09E-15  | -1.076990752           | 4.701559 | 18.69104 | 2.09E-05 | 0.001467 |
| 179 | LINC02020 | 0.7046257       | 2.562513261  | 0.50684  | 5.055867 | 4.28E-07  | 6.91E-07  | -1.971733525           | 2.2939   | 22.32922 | 3.53E-06 | 0.000337 |
| 180 | LINC02038 | 2.2463443       | 4.298854017  | 0.429334 | 10.01285 | 1.34E-23  | 3.31E-23  | -1.644965073           | 3.144195 | 15.0338  | 0.00013  | 0.006473 |
| 181 | LINC02109 | 2.5282725       | 3.957342471  | 0.428756 | 9.229834 | 2.71E-20  | 6.26E-20  | 1.213875845            | 3.193803 | 11.01758 | 0.001015 | 0.032187 |
| 182 | LINC02119 | 1.3064045       | -1.516404673 | 0.248086 | -6.11242 | 9.81E-10  | 1.73E-09  | 1.505076046            | 2.038524 | 21.92998 | 4.28E-06 | 0.00039  |
| 183 | LINC02154 | 6.418962        | 4.802921919  | 0.245231 | 19.58529 | 2.06E-85  | 1.25E-84  | -1.234281844           | 4.716773 | 12.54529 | 0.000461 | 0.018425 |
| 184 | LINC02160 | 1.3448133       | 3.459246982  | 0.364688 | 9.485492 | 2.41E-21  | 5.68E-21  | -2.639905011           | 3.240823 | 34.70557 | 1.04E-08 | 2.05E-06 |
| 185 | LINC02167 | 39.149917       | 8.423611482  | 0.330451 | 25.49126 | 2.46E-143 | 2.81E-142 | -1.954434133           | 7.397899 | 16.24134 | 7.10E-05 | 0.00399  |

| NO. | row          | Tumor vs Normal |              |          |          |           |           | Sensitive vs Resistant |          |          |          |          |
|-----|--------------|-----------------|--------------|----------|----------|-----------|-----------|------------------------|----------|----------|----------|----------|
|     |              | baseMean        | L2FC         | lfcSE    | stat     | PValue    | padj      | L2FC                   | logCPM   | F        | PValue   | FDR      |
| 186 | LINC02266    | 2.2847687       | 2.670814266  | 0.26654  | 10.02033 | 1.24E-23  | 3.07E-23  | -1.845244117           | 3.294447 | 24.23353 | 1.41E-06 | 0.000163 |
| 187 | LINC02331    | 11.370689       | 5.7359924    | 0.290962 | 19.7139  | 1.64E-86  | 1.01E-85  | 1.177915775            | 4.643964 | 15.30091 | 0.000114 | 0.00589  |
| 188 | LINC02343    | 1.0948385       | 3.245285132  | 0.350284 | 9.264722 | 1.96E-20  | 4.53E-20  | 2.805856968            | 2.943858 | 82.56641 | 1.41E-17 | 1.62E-14 |
| 189 | LINC02346    | 6.3895939       | 5.673423519  | 0.288091 | 19.69318 | 2.47E-86  | 1.51E-85  | 2.380017917            | 4.603083 | 61.25771 | 8.93E-14 | 5.75E-11 |
| 190 | LINC02365    | 3.7289013       | 4.526838908  | 0.307509 | 14.72101 | 4.73E-49  | 1.78E-48  | 1.439677489            | 3.829534 | 19.56276 | 1.37E-05 | 0.00104  |
| 191 | LINC02388    | 23.052045       | -3.892065055 | 0.235418 | -16.5326 | 2.14E-61  | 9.57E-61  | -1.384855371           | 2.809998 | 16.76114 | 5.45E-05 | 0.003275 |
| 192 | LINC02400    | 0.2793402       | 1.132434656  | 0.469153 | 2.413784 | 0.015788  | 0.020582  | 3.02221642             | 2.072537 | 104.2505 | 3.19E-21 | 4.70E-18 |
| 193 | LINC02404    | 0.7376416       | 1.87768375   | 0.350942 | 5.350406 | 8.78E-08  | 1.45E-07  | -1.919492302           | 2.224255 | 25.81067 | 6.61E-07 | 8.30E-05 |
| 194 | LINC02434    | 1.3942391       | 3.621452521  | 0.631372 | 5.735848 | 9.70E-09  | 1.65E-08  | 1.49720105             | 3.307465 | 14.51533 | 0.000169 | 0.008068 |
| 195 | LINC02435    | 3.6951108       | 2.307745574  | 0.213419 | 10.81322 | 2.98E-27  | 7.87E-27  | 1.040235918            | 3.293712 | 15.15976 | 0.000122 | 0.006176 |
| 196 | LINC02455    | 0.3862404       | 1.46629257   | 0.312196 | 4.696711 | 2.64E-06  | 4.14E-06  | -1.572430223           | 1.990263 | 19.53846 | 1.38E-05 | 0.00104  |
| 197 | LINC02489    | 1.2123609       | -2.211908238 | 0.23004  | -9.6153  | 6.89E-22  | 1.64E-21  | -1.707348728           | 1.794657 | 22.21629 | 3.72E-06 | 0.000346 |
| 198 | LINC02582    | 1.1698551       | 2.342390162  | 0.342357 | 6.841953 | 7.81E-12  | 1.46E-11  | 3.632333278            | 3.638142 | 109.4955 | 5.10E-22 | 9.68E-19 |
| 199 | LINC02623    | 0.3040792       | 1.194864247  | 0.407327 | 2.933424 | 0.003352  | 0.004558  | 2.241426124            | 1.919123 | 57.53498 | 4.13E-13 | 2.36E-10 |
| 200 | LINC02660    | 0.7206736       | 1.40151389   | 0.341109 | 4.108693 | 3.98E-05  | 5.94E-05  | 1.292853041            | 1.939662 | 20.36265 | 9.19E-06 | 0.000734 |
| 201 | LINC02753    | 0.5354259       | 1.521195519  | 0.436951 | 3.481386 | 0.000499  | 0.000709  | 1.670359651            | 1.914683 | 32.23444 | 3.21E-08 | 5.70E-06 |
| 202 | LINGO1-AS1   | 3.8763031       | -1.216092737 | 0.162301 | -7.49283 | 6.74E-14  | 1.33E-13  | -1.551248533           | 3.537804 | 16.71804 | 5.59E-05 | 0.003328 |
| 203 | MACC1-AS1    | 2.2531878       | -1.961323092 | 0.241638 | -8.1168  | 4.79E-16  | 1.01E-15  | -4.436964101           | 5.573495 | 45.34977 | 8.62E-11 | 3.17E-08 |
| 204 | MAPT-AS1     | 2.4868358       | -3.414411295 | 0.179183 | -19.0554 | 5.93E-81  | 3.41E-80  | 1.396651246            | 1.618947 | 29.20587 | 1.32E-07 | 2.00E-05 |
| 205 | MIR137HG     | 7.7686999       | -3.363704573 | 0.241617 | -13.9216 | 4.68E-44  | 1.63E-43  | -1.356180566           | 2.170404 | 15.3024  | 0.000113 | 0.00589  |
| 206 | MXK-AS1      | 6.5038759       | -2.660284337 | 0.175821 | -15.1306 | 1.02E-51  | 3.97E-51  | 2.117956394            | 2.871566 | 45.50721 | 7.81E-11 | 3.10E-08 |
| 207 | MNX1-AS1     | 9.7248262       | 5.483039285  | 0.345771 | 15.85742 | 1.25E-56  | 5.23E-56  | -1.708212075           | 5.063799 | 14.71159 | 0.000153 | 0.007415 |
| 208 | NDP-AS1      | 1.1897343       | 1.332187814  | 0.280192 | 4.75456  | 1.99E-06  | 3.13E-06  | -1.914451653           | 2.732771 | 22.64565 | 3.03E-06 | 0.000295 |
| 209 | NGF-AS1      | 3.5832859       | -2.446169657 | 0.166861 | -14.6599 | 1.16E-48  | 4.36E-48  | -3.062214318           | 4.033001 | 36.04342 | 5.65E-09 | 1.29E-06 |
| 210 | OVAAL        | 31.407139       | 6.8502634    | 0.23988  | 28.55704 | 2.30E-179 | 3.72E-178 | 1.297310236            | 6.75944  | 17.78622 | 3.29E-05 | 0.002147 |
| 211 | PCAT14       | 242.23265       | -3.052382289 | 0.166536 | -18.3287 | 4.89E-75  | 2.62E-74  | 1.415910787            | 6.831577 | 23.46438 | 2.06E-06 | 0.000208 |
| 212 | PINCR        | 1.1481895       | 3.400469112  | 0.533253 | 6.376845 | 1.81E-10  | 3.24E-10  | -1.601523889           | 3.380174 | 11.44815 | 0.000812 | 0.027354 |
| 213 | PKIA-AS1     | 12.330221       | -1.20596644  | 0.202967 | -5.94167 | 2.82E-09  | 4.89E-09  | -1.172176188           | 3.680883 | 14.55231 | 0.000165 | 0.007971 |
| 214 | PLCH1-AS1    | 0.281337        | 1.378708674  | 0.406697 | 3.390018 | 0.000699  | 0.000987  | -1.106614413           | 1.56946  | 16.54357 | 6.07E-05 | 0.003503 |
| 215 | PROX1-AS1    | 12.642316       | -2.432773496 | 0.167528 | -14.5216 | 8.84E-48  | 3.28E-47  | 1.622737057            | 3.556492 | 28.89639 | 1.54E-07 | 2.27E-05 |
| 216 | RORB-AS1     | 3.4583728       | 2.004943932  | 0.273187 | 7.339093 | 2.15E-13  | 4.20E-13  | 2.360603869            | 4.283446 | 44.53946 | 1.23E-10 | 3.98E-08 |
| 217 | SIRLNT       | 0.3215783       | 1.3087273    | 0.509166 | 2.570337 | 0.01016   | 0.013437  | -1.751413188           | 2.177017 | 16.61653 | 5.86E-05 | 0.003471 |
| 218 | TDRG1        | 7.606614        | 1.079154571  | 0.227152 | 4.750802 | 2.03E-06  | 3.18E-06  | 1.559150615            | 4.596575 | 19.12827 | 1.70E-05 | 0.001222 |
| 219 | TMEM132D-AS1 | 2.6425007       | 4.136571256  | 0.468999 | 8.819997 | 1.14E-18  | 2.56E-18  | 3.258336968            | 4.809328 | 66.0823  | 1.21E-14 | 8.89E-12 |
| 220 | U95743.1     | 3.3561186       | 4.906968835  | 0.495362 | 9.90582  | 3.93E-23  | 9.61E-23  | 1.13857793             | 3.19652  | 10.03412 | 0.001696 | 0.048037 |
